# Supplementary material for: Synergic coordination of multicomponents for the formation of a {Ni30} cluster substituted polyoxometalate and its in situ assembly
Source: Royal Society of Chemistry journal article supplement (doi:10.1039/d2qi01073a), 2022-01-01
Supplement: d2qi01073a1.pdf [file d2qi01073a1.pdf]

# Supporting Information

## Synergic Coordination of Multicomponents for the Formation of a {Ni<sub>30</sub>} Cluster Substituted Polyoxometalate and Its In-situ Assembly

Sa-Sa Wang,<sup>a</sup> Xiang-Yu Kong,<sup>a,c</sup> Weiming Wu,<sup>a</sup> Xiao-Yuan Wu,<sup>a</sup> Sheng Cai,<sup>a</sup> and Can-Zhong Lu<sup>\*a,b</sup>

<sup>a</sup> CAS Key Laboratory of Design and Assembly of Functional Nanostructures, and Fujian Key Laboratory of Nanomaterials, Fujian Institute of Research on the Structure of Matter, Chinese Academy of Sciences, Fuzhou, Fujian 350002, China

<sup>b</sup> University of Chinese Academy of Science, Beijing 100049, China

<sup>c</sup> School of Physical Science and Technology, ShanghaiTech University, Shanghai 201210, China

\* To whom correspondence should be addressed: [czlu@fjirsm.ac.cn](mailto:czlu@fjirsm.ac.cn)

### 1. Materials and Characterization

The precursor Na<sub>9</sub>PW<sub>9</sub> were prepared according to the published synthetic method.<sup>[S1]</sup> All other reagents were purchased from commercial sources and used as received without further treatment. The single crystal X-ray diffraction data were collected on Oxford Diffraction / Agilent SuperNova (dual source) diffractometer using CuK $\alpha$  radiation. Calculations were performed with SHELXL-2018 / 1 program package, and the structures were solved by direct method and refined on F<sup>2</sup> by full-matrix least-squares method.<sup>[S2]</sup> Thermogravimetric analyses (TGA) were performed with a TGA / DSC 1 STAR<sup>e</sup> system under N<sub>2</sub> atmosphere in a temperature range of 30-900 °C. For Fourier Transform Infrared (FT-IR) spectroscopy, the samples were prepared as KBr pellets and the spectra were collected in transmission mode using a VERTEX70 infrared analyzer in a range of 4000~400 cm<sup>-1</sup>. Intensities are denoted as s = strong, w = weak, m = medium, sh = sharp, br = broad. Element analyses (C, H, N) were measured with a vario MICRO analyzer. UV-VIS-NIR spectra were scanned in the wavelength range of 200~2000 nm at room temperature on a Perkin Elmer Lambda-950 UV/Vis/NIR spectrophotometer, using a powder sample with BaSO<sub>4</sub> as a standard (100 % reflectance). Powder X-ray diffraction (PXRD) were carried out on Rigaku desktop MiniFlex 600 diffractometer with CuK $\alpha$  radiation ( $\lambda$  = 1.54184 Å). HERs were carried out under the irradiation of a 300 W Xe lamp with a cut-off filter ( $\lambda$   $\geq$  420 nm), and the resulting H<sub>2</sub> amounts were determined by a gas chromatograph (GC2014C, Shimadzu Co., TCD, molecular sieve 5A column, argon carrier).

### 2. Experiment Details

**Synthesis of 1.** 0.25 g  $\text{Na}_9\text{PW}_9$ , 0.8 g  $\text{NiCl}_2 \cdot 6\text{H}_2\text{O}$ , 0.035 g Htrz, 8 mL distilled water and 0.08 mL en were successively added into in a 25-mL PTFE container. After ultrasonic treatment for 10 min, the mixture was sealed in a stainless steel reactor that was subsequently heated at 160 °C for 3 days. After the temperature cooled down to room temperature, cyan plate crystals were yielded. CCDC number: 2093863. Anal. Calcd (%) for **1** ( $\text{C}_{64}\text{H}_{670}\text{N}_{86}\text{O}_{488}\text{P}_6\text{Ni}_{43}\text{W}_{54}$ ): C 3.33, H 2.90, N 5.22. Found: C 3.27, H 2.24, N 4.87. FT-IR (KBr pellet): 3431  $\text{cm}^{-1}$  (s, br), 1632  $\text{cm}^{-1}$  (m), 1510  $\text{cm}^{-1}$  (w, sh), 1458  $\text{cm}^{-1}$  (w), 1287  $\text{cm}^{-1}$  (w), 1213  $\text{cm}^{-1}$  (w), 1165  $\text{cm}^{-1}$  (w), 1040  $\text{cm}^{-1}$  (s), 941  $\text{cm}^{-1}$  (s), 803  $\text{cm}^{-1}$  (s), 710  $\text{cm}^{-1}$  (s). TG: the weight loss of 15.75% (calculated 17.30%) before 400 °C is attributed to the removal of lattice water. According to EA and TGA, the structure includes 222 water molecules and 4 Htrz molecules, but most of them can't be unambiguously located by X-ray single crystal diffraction. Finally, the formula of **1** is determined as  $[\text{Ni}_{11}(\text{trz})_{12}(\text{en})_4(\text{H}_2\text{O})_{22}]\text{H}_4\{[\text{Ni}(\text{trz})_3(\text{H}_2\text{O})_3]_2[\text{Ni}_{30}(\mu_3\text{-OH})_{18}(\text{H}_2\text{O})_{16}(\text{en})_6(\text{PW}_9\text{O}_{34})_6]\} \cdot 4\text{Htrz} \cdot 222\text{H}_2\text{O}$ .

**Synthesis of 2.** 0.244 g  $\text{Na}_9\text{PW}_9$ , 0.8 g  $\text{NiCl}_2 \cdot 6\text{H}_2\text{O}$ , 0.035 g Htrz, 8 mL deionized water and 0.09 g en were successively added into in a 25-mL PTFE container. After ultrasonic treatment for 25 min, the mixture was sealed in a stainless steel reactor that was subsequently heated at 180 °C for 3 days. After the temperature cooled down to room temperature, cyan columnar crystals were yielded. CCDC number: 2093864. Anal. Calcd (%) for **2** ( $\text{C}_{60}\text{H}_{430}\text{N}_{82}\text{O}_{364}\text{P}_6\text{Ni}_{46}\text{W}_{54}$ ): C 3.44, H 2.07, N 5.48. Found: C 3.37, H 1.55, N 5.22. FT-IR (KBr pellet): 3430  $\text{cm}^{-1}$  (s, br), 1624  $\text{cm}^{-1}$  (m), 1504  $\text{cm}^{-1}$  (w, sh), 1458  $\text{cm}^{-1}$  (w), 1283  $\text{cm}^{-1}$  (w), 1210  $\text{cm}^{-1}$  (w), 1155  $\text{cm}^{-1}$  (w), 1036  $\text{cm}^{-1}$  (s), 945  $\text{cm}^{-1}$  (s), 799  $\text{cm}^{-1}$  (s), 709  $\text{cm}^{-1}$  (s). TG: the weight loss of 10.64% (calculated 8.08%) before 380 °C is attributed to the removal of lattice water. According to EA, TGA, the structure approximately includes 94 water molecules and 4 Htrz molecules, but most of them can't be unambiguously located by X-ray single crystal diffraction. Finally, the formula of **2** is determined as  $[\text{Ni}_6(\text{trz})_6(\mu_3\text{-OH})(\text{en})(\text{H}_2\text{O})_{10}]_2\text{H}_8\{[\text{Ni}(\text{trz})_3(\text{H}_2\text{O})_3]_2[\text{Ni}_{30+2}(\mu_3\text{-OH})_{18}(\text{O})_4(\text{H}_2\text{O})_{16}(\text{en})_6(\text{PW}_9\text{O}_{34})_6]\} \cdot 4\text{Htrz} \cdot 94\text{H}_2\text{O}$ .

**Synthesis of 4.** 0.35 g  $\text{Na}_9\text{PW}_9$ , 0.8 g  $\text{NiCl}_2 \cdot 6\text{H}_2\text{O}$ , 0.035 g Htrz, 10 mL deionized water and 0.1 g en were successively added into in a 25-mL PTFE container. After ultrasonic treatment for 10 min, the mixture was sealed in a stainless steel reactor that was subsequently heated at 140 °C for 3 days. After the temperature cooled down to room temperature, cyan prism crystals were yielded. CCDC number: 2093865. Anal. Calcd (%) for **4** ( $\text{C}_{64}\text{H}_{624}\text{N}_{80}\text{O}_{524}\text{P}_8\text{Ni}_{52}\text{W}_{72}$ ): C 2.80, H 2.22, N 4.08. Found: C 2.90, H 1.85, N 3.92. FT-IR (KBr pellet): 3416  $\text{cm}^{-1}$  (s, br), 1625  $\text{cm}^{-1}$  (m), 1513  $\text{cm}^{-1}$  (w, sh), 1287  $\text{cm}^{-1}$  (w), 1214  $\text{cm}^{-1}$  (w), 1162  $\text{cm}^{-1}$  (w), 1038  $\text{cm}^{-1}$  (s), 945  $\text{cm}^{-1}$  (s), 807  $\text{cm}^{-1}$  (s), 710  $\text{cm}^{-1}$  (s). TG: the weight loss of 11.03% (calculated 11.41%) before 390 °C is attributed to the removal of lattice water. According to EA, TGA, the structure approximately includes 174 water molecules and 4 Htrz molecules that can't be unambiguously located by X-ray single crystal diffraction. Finally, the formula of **4** is determined as  $[\text{Ni}_3(\text{trz})_3(\text{en})(\text{H}_2\text{O})_8]_2\{[\text{Ni}(\text{en})(\text{H}_2\text{O})_2]\text{H}_4[\text{Ni}_6(\mu_3\text{-OH})_3(\text{H}_2\text{O})_5(\text{en})_3(\text{PW}_9\text{O}_{34})]\}_2\{[\text{Ni}(\text{trz})_3(\text{H}_2\text{O})_3]_2[\text{Ni}_{30}(\mu_3\text{-OH})_{18}(\text{H}_2\text{O})_{16}(\text{en})_6(\text{PW}_9\text{O}_{34})_6]\} \cdot 4\text{Htrz} \cdot 174\text{H}_2\text{O}$ .

**Photocatalytic experiments.** To a 10 ml Pyrex reaction tube charged with 15 mg ground catalyst (for **1**, **2**, and **4**) was added 4 mL acetonitrile solution of 200  $\mu\text{M}$  [Ir], 0.1 M, BNAH and 0.25 M TEOA. The tube was sealed and

degassed under dark with nitrogen five times by freeze-pump-thaw-aerate cycles. Then the mixture was stirred and irradiated with a 300 W Xe lamp with a 420 nm cut-off filter. 200  $\mu$ l gas in the headspace was taken out for GC analysis every 30 minutes. The amounts of generated H<sub>2</sub> were quantified by gas chromatography analysis of the headspace gas in the reactor. The replenishment of [Ir] photosensitizer for the resuscitating experiment was conducted by injecting 0.1 ml acetonitrile solution of [Ir]. For recycling experiments, the catalyst was filtered out with microporous filtering film ( $\Phi$ 50mm, 0.45 $\mu$ m) after reaction and washed thoroughly with water and ethanol in succession. After naturally dried, the recovered catalyst was used in the next reaction run. During the procedure, no obvious weight loss of catalysts was observed. For controlling experiments, the dosage of Ni<sub>6</sub>POM-1 was 3 mg, equivalent to the mole of [Ni(trz)<sub>3</sub>]<sub>2</sub>@[Ni<sub>30</sub>(H<sub>2</sub>O)<sub>16</sub>]POM.

### 3. Additional Tables and Figures

**Table S1.** Crystal data and structure refinements for **1–4**.

|                                                                                                                | <b>1</b>                                                                                                          | <b>2</b>                                                                                                          | <b>3</b>                                                                                                                          | <b>4</b>                                                                                                          |
|----------------------------------------------------------------------------------------------------------------|-------------------------------------------------------------------------------------------------------------------|-------------------------------------------------------------------------------------------------------------------|-----------------------------------------------------------------------------------------------------------------------------------|-------------------------------------------------------------------------------------------------------------------|
| Formula                                                                                                        | C <sub>56</sub> H <sub>172</sub> N <sub>74</sub> Ni <sub>43</sub> O <sub>268</sub> P <sub>6</sub> W <sub>54</sub> | C <sub>52</sub> H <sub>140</sub> N <sub>70</sub> Ni <sub>46</sub> O <sub>273</sub> P <sub>6</sub> W <sub>54</sub> | C <sub>60</sub> H <sub>240</sub> Cl <sub>2</sub> N <sub>78</sub> Ni <sub>48</sub> O <sub>281</sub> P <sub>4</sub> W <sub>54</sub> | C <sub>56</sub> H <sub>264</sub> N <sub>68</sub> Ni <sub>52</sub> O <sub>354</sub> P <sub>8</sub> W <sub>72</sub> |
| Formula weight                                                                                                 | 18808.92                                                                                                          | 18928.71                                                                                                          | 19492.05                                                                                                                          | 24093.21                                                                                                          |
| T(K)                                                                                                           | 100                                                                                                               | 100                                                                                                               | 100                                                                                                                               | 100                                                                                                               |
| Crystal system                                                                                                 | Triclinic                                                                                                         | Monoclinic                                                                                                        | Monoclinic                                                                                                                        | Triclinic                                                                                                         |
| Space group                                                                                                    | <i>P</i> -1                                                                                                       | <i>C</i> 2/ <i>c</i>                                                                                              | <i>P</i> 2 <sub>1</sub> / <i>n</i>                                                                                                | <i>P</i> -1                                                                                                       |
| <i>a</i> (Å)                                                                                                   | 20.9289(5)                                                                                                        | 42.6584(3)                                                                                                        | 26.0749(3)                                                                                                                        | 19.4435(4)                                                                                                        |
| <i>b</i> (Å)                                                                                                   | 23.2751(5)                                                                                                        | 27.2039(2)                                                                                                        | 23.1535(3)                                                                                                                        | 23.7706(4)                                                                                                        |
| <i>c</i> (Å)                                                                                                   | 24.7121(4)                                                                                                        | 32.2228(3)                                                                                                        | 32.2661(4)                                                                                                                        | 26.9875(4)                                                                                                        |
| $\alpha$ (°)                                                                                                   | 79.0429(16)                                                                                                       | 90                                                                                                                | 90                                                                                                                                | 72.326(1)                                                                                                         |
| $\beta$ (°)                                                                                                    | 74.1790(19)                                                                                                       | 92.9654(7)                                                                                                        | 102.9169(12)                                                                                                                      | 80.482(1)                                                                                                         |
| $\gamma$ (°)                                                                                                   | 68.585(2)                                                                                                         | 90                                                                                                                | 90                                                                                                                                | 77.460(2)                                                                                                         |
| <i>V</i> (Å <sup>3</sup> )                                                                                     | 10727.0(4)                                                                                                        | 37343.7(5)                                                                                                        | 18986.9(4)                                                                                                                        | 11534.4(4)                                                                                                        |
| <i>Z</i>                                                                                                       | 1                                                                                                                 | 4                                                                                                                 | 2                                                                                                                                 | 1                                                                                                                 |
| <i>D</i> <sub>x</sub> (g / cm <sup>3</sup> )                                                                   | 2.912                                                                                                             | 3.367                                                                                                             | 3.409                                                                                                                             | 3.469                                                                                                             |
| $\mu$ (mm <sup>-1</sup> )                                                                                      | 28.876                                                                                                            | 33.337                                                                                                            | 32.982                                                                                                                            | 35.518                                                                                                            |
| <i>F</i> (000)                                                                                                 | 8460.0                                                                                                            | 34000.0                                                                                                           | 17656.0                                                                                                                           | 10812.0                                                                                                           |
| $\vartheta$ range (°)                                                                                          | 2.049-68.251                                                                                                      | 2.074-63.999                                                                                                      | 2.370-73.495                                                                                                                      | 1.982-75.099                                                                                                      |
| Limiting indices                                                                                               | -25 ≤ <i>h</i> ≤ 25<br>-26 ≤ <i>k</i> ≤ 28<br>-29 ≤ <i>l</i> ≤ 23                                                 | -49 ≤ <i>h</i> ≤ 49<br>-31 ≤ <i>k</i> ≤ 31<br>-36 ≤ <i>l</i> ≤ 37                                                 | -32 ≤ <i>h</i> ≤ 30<br>-23 ≤ <i>k</i> ≤ 28<br>-27 ≤ <i>l</i> ≤ 40                                                                 | -24 ≤ <i>h</i> ≤ 23<br>-29 ≤ <i>k</i> ≤ 29<br>-21 ≤ <i>l</i> ≤ 32                                                 |
| Reflections collected / unique                                                                                 | 74805 / 39183                                                                                                     | 202375 / 31003                                                                                                    | 78016 / 37291                                                                                                                     | 89352 / 46199                                                                                                     |
| <i>R</i> (int)                                                                                                 | 0.0581                                                                                                            | 0.0671                                                                                                            | 0.0450                                                                                                                            | 0.0409                                                                                                            |
| <i>S</i>                                                                                                       | 1.043                                                                                                             | 1.099                                                                                                             | 1.030                                                                                                                             | 1.023                                                                                                             |
| <i>R</i> <sub>1</sub> <sup>a</sup> , <i>wR</i> <sub>2</sub> <sup>b</sup> [ <i>I</i> > 2 $\sigma$ ( <i>I</i> )] | 0.0494, 0.1350                                                                                                    | 0.0947, 0.2213                                                                                                    | 0.0387, 0.0931                                                                                                                    | 0.0366, 0.0899                                                                                                    |
| <i>R</i> <sub>1</sub> , <i>wR</i> <sub>2</sub> (all data)                                                      | 0.0623, 0.1454                                                                                                    | 0.1040, 0.2248                                                                                                    | 0.0462, 0.0979                                                                                                                    | 0.0425, 0.0936                                                                                                    |
| CCDC                                                                                                           | 2093863                                                                                                           | 2093864                                                                                                           | 2106591                                                                                                                           | 2093865                                                                                                           |

<sup>a</sup>  $R_1 = \Sigma ||F_o| - |F_c|| / \Sigma |F_o|$ ; <sup>b</sup>  $wR_2 = \Sigma [w(F_o^2 - F_c^2)^2] / \Sigma [w(F_o^2)^2]^{1/2}$ .

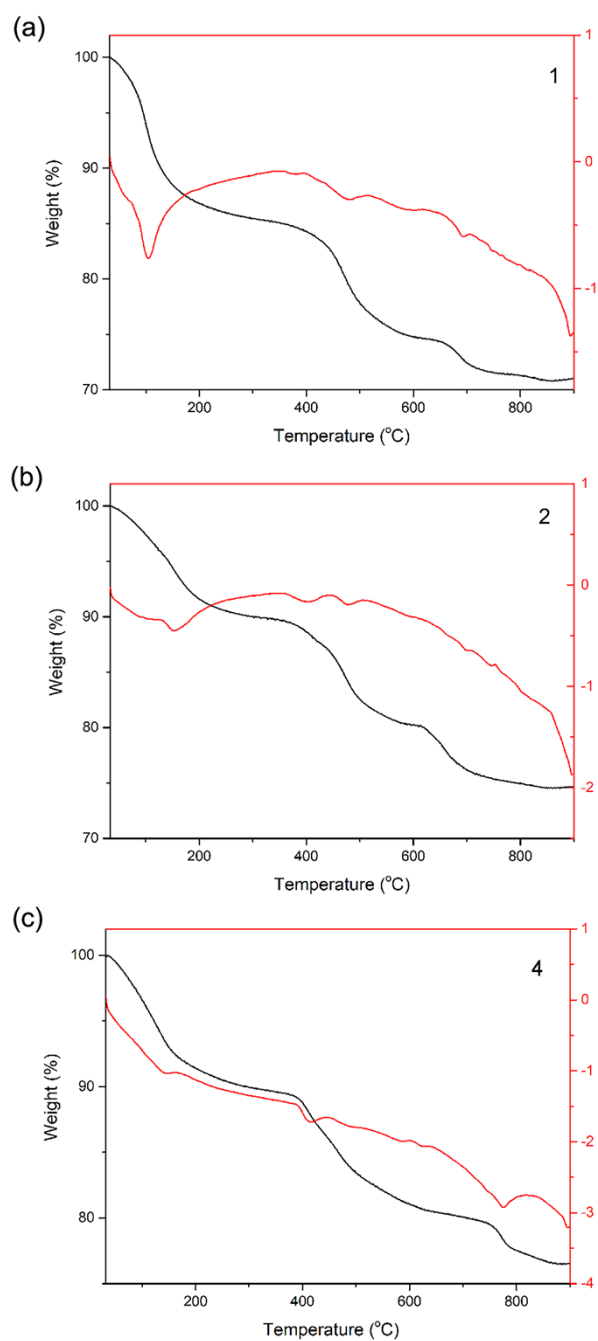

Fig. S1 TG curves of **1**, **2**, and **4**.

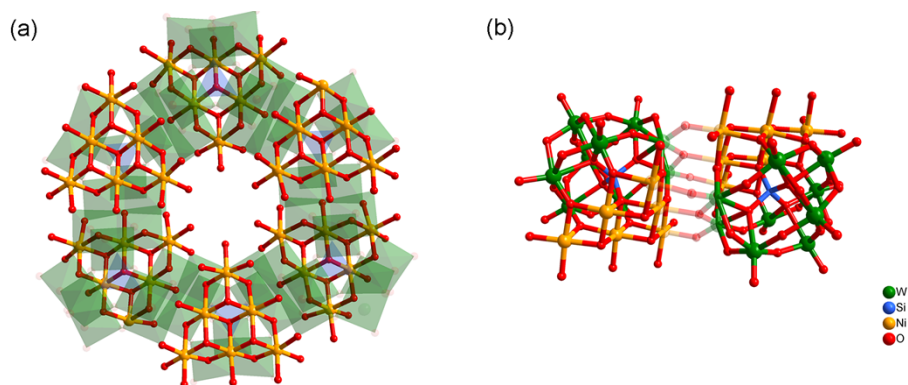

Fig. S2 (a) Structure of the reported  $[\text{Ni}_6\text{POM}]_6$  by Kortz; (b) Connecting mode of neighbouring  $\text{Ni}_6\text{POM}$  fragments in  $[\text{Ni}_6\text{POM}]_6$ .

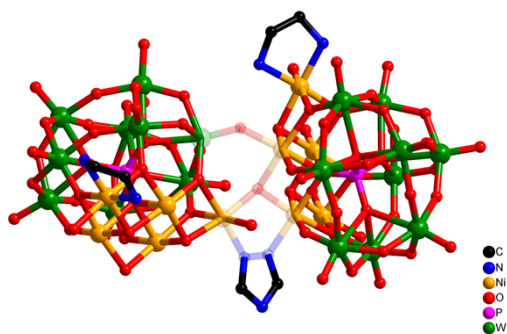

**Fig. S3** Connecting mode of neighbouring Ni<sub>5</sub>POM fragments in [Ni(trz)<sub>3</sub>]<sub>2</sub>@[Ni<sub>30</sub>(H<sub>2</sub>O)<sub>16</sub>]POM.

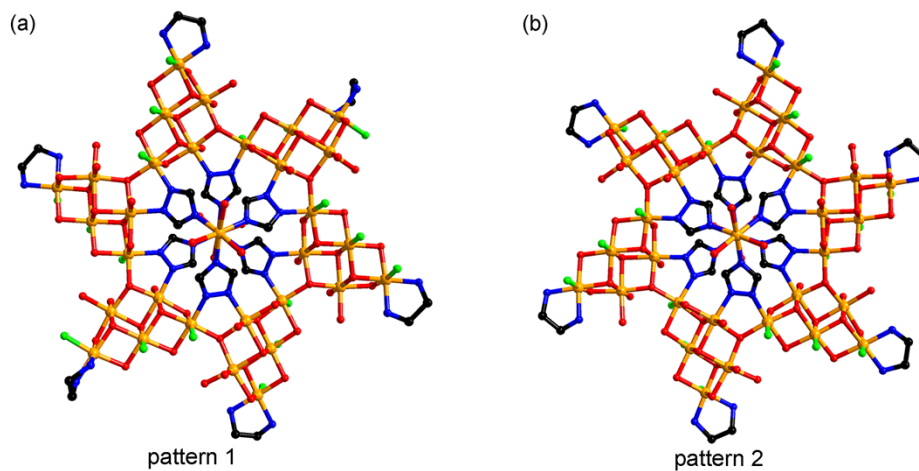

**Fig. S4** Illustration of the deduced {Ni<sub>30</sub>} cluster with 18 coordinating water (two patterns). (color code: green O from coordinating water; red O; orange Ni; blue N; black C).

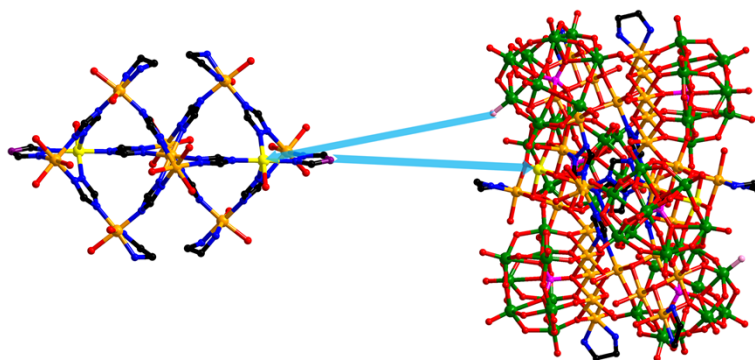

**Fig. S5** [Ni<sub>11</sub>(trz)<sub>12</sub>] fragment (left) and SBU (right) in **1** (color code: red O; pink coordinating terminal O; orange Ni; yellow coordinating Ni; blue N; dark purple coordinating N; purple P; black C).

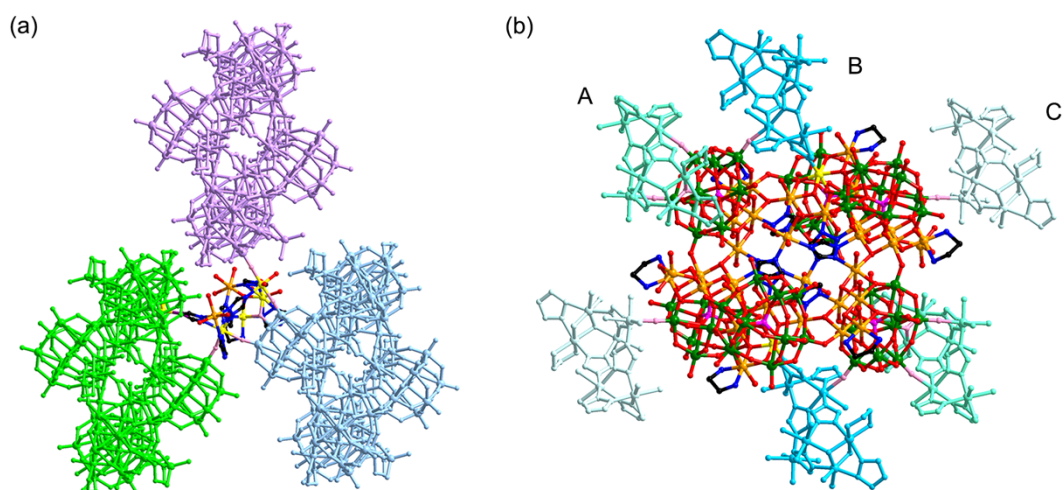

**Fig. S6** (a) Three SBUs connected by one  $[\text{Ni}_6(\text{trz})_6]$  bridges; (b) six  $[\text{Ni}_6(\text{trz})_6]$  bridges bound by one SBU in **2**. (color code: red O; pink coordinating terminal O; orange Ni; yellow coordinating Ni; purple P; blue N; dark purple coordinating N; black C).

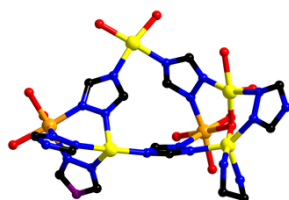

**Fig. S7** Coordinating sites of  $[\text{Ni}_6(\text{trz})_6]$  bridge in **2**. (color code: red O; orange Ni; yellow coordinating Ni; blue N; dark purple coordinating N; black C).

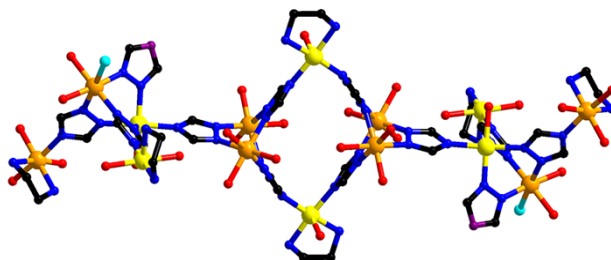

**Fig. S8** Coordinating sites of  $[\text{Ni}_{14}(\text{trz})_{12}]$  bridge in **3**. (color code: red O; orange Ni; yellow coordinating Ni; blue N; dark purple coordinating N; black C; cyan Cl).

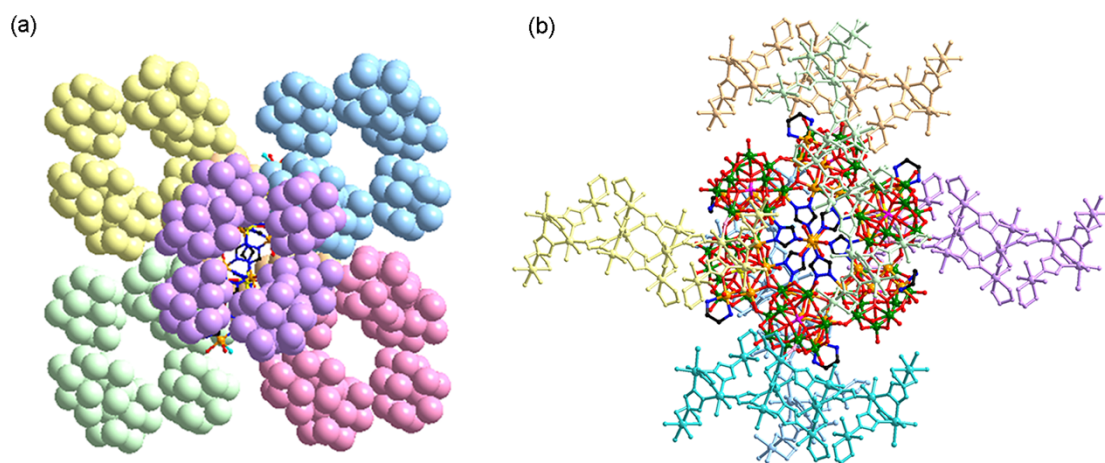

**Fig. S9** Crystallographic illustration of the six  $[\text{Ni}(\text{trz})_3]_2@[\text{Ni}_{30}(\text{H}_2\text{O})_{16}]$ POM linked by a  $[\text{Ni}_{14}(\text{trz})_{12}]$  bridge in **3**. (color code: red O; pink coordinating terminal O; orange Ni; yellow coordinating Ni; purple P; blue N; dark purple coordinating N; black C; cyan Cl). In the space-filling mode, C, N, O and the Ni atoms locating at the center of  $[\text{Ni}(\text{trz})_3]_2@[\text{Ni}_{30}(\text{H}_2\text{O})_{16}]$ POM have been omitted for clarity.

**Table S2.** The relationship of the dimension of frameworks **1–3** and the coordinating sites provided by  $[\text{Ni}_x(\text{trz})_y]$  bridges in them.

| Framework | dimension | bridge                              | Ni coordinating sites | N coordinating sites | Total number of coordinating sites |
|-----------|-----------|-------------------------------------|-----------------------|----------------------|------------------------------------|
| <b>1</b>  | 1         | $[\text{Ni}_{11}(\text{trz})_{12}]$ | 2                     | 2                    | 4                                  |
| <b>2</b>  | 2         | $[\text{Ni}_6(\text{trz})_6]$       | 4                     | 1                    | 5                                  |
| <b>3</b>  | 3         | $[\text{Ni}_{14}(\text{trz})_{12}]$ | 6                     | 2                    | 8                                  |

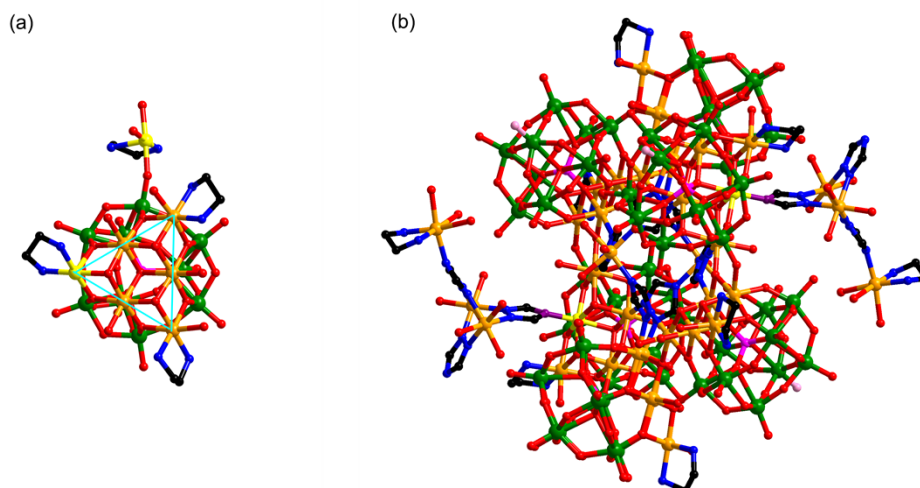

**Fig. S10** (a) Bridge of **4**; (b) decorated SBU of **4** (color code: red O; pink coordinating terminal O; orange Ni; yellow coordinating Ni; purple P; blue N; dark purple coordinating N; black C).

**Table S3.** Photocatalytic activities of other POM compounds for  $\text{H}_2$  evolution.

| Catalyst                                                                                                                                                            | PS/ED                                                               | Medium/ PD                                           | TON  | Time (h) | Ref.      |
|---------------------------------------------------------------------------------------------------------------------------------------------------------------------|---------------------------------------------------------------------|------------------------------------------------------|------|----------|-----------|
| $\text{K}_4\{[\text{Cu}_{29}(\text{OH})_7(\text{H}_2\text{O})_2(\text{en})_8(\text{trz})_{21}][\text{Nb}_{24}\text{O}_{67}(\text{OH})_2(\text{H}_2\text{O})_3]_4\}$ | $[\text{Ir}(\text{ppy})_2(\text{dtbbpy})][\text{PF}_6]/\text{TEOA}$ | $\text{CH}_3\text{CN}/\text{DMF}/\text{H}_2\text{O}$ | 57.5 | 12       | S3        |
| $[\text{Cu}(\text{en})_2]@[\text{Cu}_2(\text{en})_2(\text{trz})_2]_6[\text{Nb}_{68}\text{O}_{188}]$                                                                 | $[\text{Ir}(\text{ppy})_2(\text{dtbbpy})][\text{PF}_6]/\text{TEOA}$ | $\text{CH}_3\text{CN}/\text{DMF}/\text{H}_2\text{O}$ | 60.0 | 12       | S3        |
| $\{[\text{Cu}(\text{en})_2]@[\text{Cu}_2(\text{trz})_2(\text{en})_2]_6[\text{H}_{10}\text{Nb}_{68}\text{O}_{188}]\}$                                                | $[\text{Ir}(\text{ppy})_2(\text{dtbbpy})][\text{PF}_6]/\text{TEOA}$ | $\text{CH}_3\text{CN}/\text{DMF}/\text{H}_2\text{O}$ | 59.0 | 12       | S3        |
| $[\text{M}(\text{H}_2\text{O})\text{TiW}_{11}\text{O}_{39}]^{n-}$ (M=Fe, Co, Zn)                                                                                    | –/PVA                                                               | PVA/ $\text{H}_2\text{O}$                            | 3.2  | 3        | S4        |
| $[\text{Ni}_4(\text{H}_2\text{O})(\text{PW}_9\text{O}_{34})_2]^{10-}$                                                                                               | $[\text{Ir}(\text{ppy})_2(\text{dtbbpy})]^+/\text{TEOA}$            | $\text{CH}_3\text{CN}/\text{DMF}/\text{H}_2\text{O}$ | 290  | 2.5      | S5        |
| $[\text{Mn}_4(\text{H}_2\text{O})_2(\text{VW}_9\text{O}_{34})_2]^{10-}$                                                                                             | $[\text{Ru}(\text{bpy})_3]^{2+}/\text{TEOA}$                        | $\text{DMF}/\text{H}_2\text{O}$                      | 42   | 5.5      | S6        |
| $[\text{H}_2\text{NiNb}_9\text{O}_{28}]^{n-}$                                                                                                                       | –/MeOH                                                              | MeOH (20 vol.% )/ $\text{H}_2\text{O}$               | 7.5  | 8        | S7        |
| $[\text{Fe}_6\text{Se}_6\text{W}_{34}\text{O}_{124}(\text{OH})_{16}]^{18-}$                                                                                         | –/MeOH                                                              | MeOH (20 vol.% )/ $\text{H}_2\text{O}$               | 181  | 12       | S8        |
| $[\text{Fe}_{10}\text{Se}_8\text{W}_{62}\text{O}_{222}(\text{OH})_{18}(\text{H}_2\text{O})_4]^{28-}$                                                                | –/MeOH                                                              | MeOH (20 vol.% )/ $\text{H}_2\text{O}$               | 193  | 12       | S8        |
| <b>1</b>                                                                                                                                                            | $[\text{Ir}(\text{ppy})_2(\text{dtbbpy})][\text{PF}_6]/\text{BNAH}$ | $\text{CH}_3\text{CN}/\text{TEOA}$                   | 56.2 | 2        | This work |
| <b>2</b>                                                                                                                                                            | $[\text{Ir}(\text{ppy})_2(\text{dtbbpy})][\text{PF}_6]/\text{BNAH}$ | $\text{CH}_3\text{CN}/\text{TEOA}$                   | 34.1 | 2        | This work |
| <b>4</b>                                                                                                                                                            | $[\text{Ir}(\text{ppy})_2(\text{dtbbpy})][\text{PF}_6]/\text{BNAH}$ | $\text{CH}_3\text{CN}/\text{TEOA}$                   | 56.9 | 2        | This work |

PS = photosensitizer; ED = electron donor; PD = proton donor; PVA = polyvinyl alcohol.

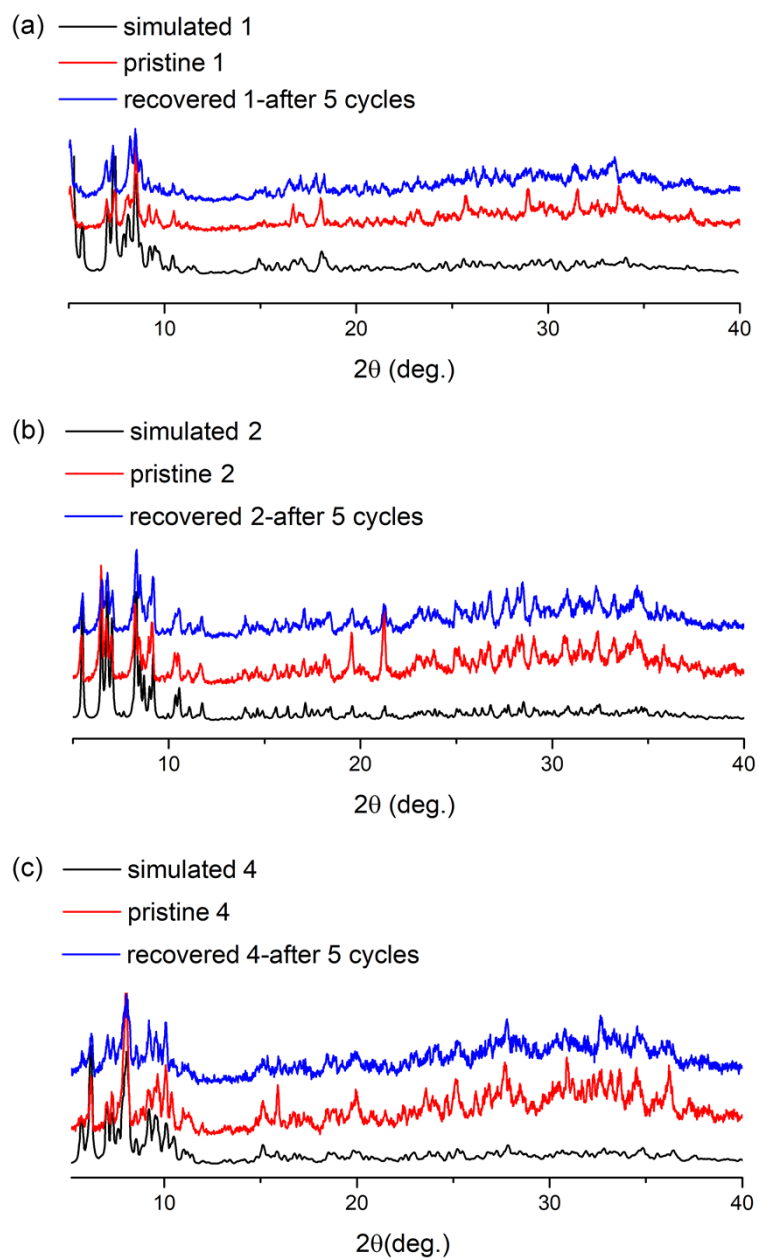

Fig. S11 PXRD patterns of simulated, pristine and recovered 1, 2, and 4.



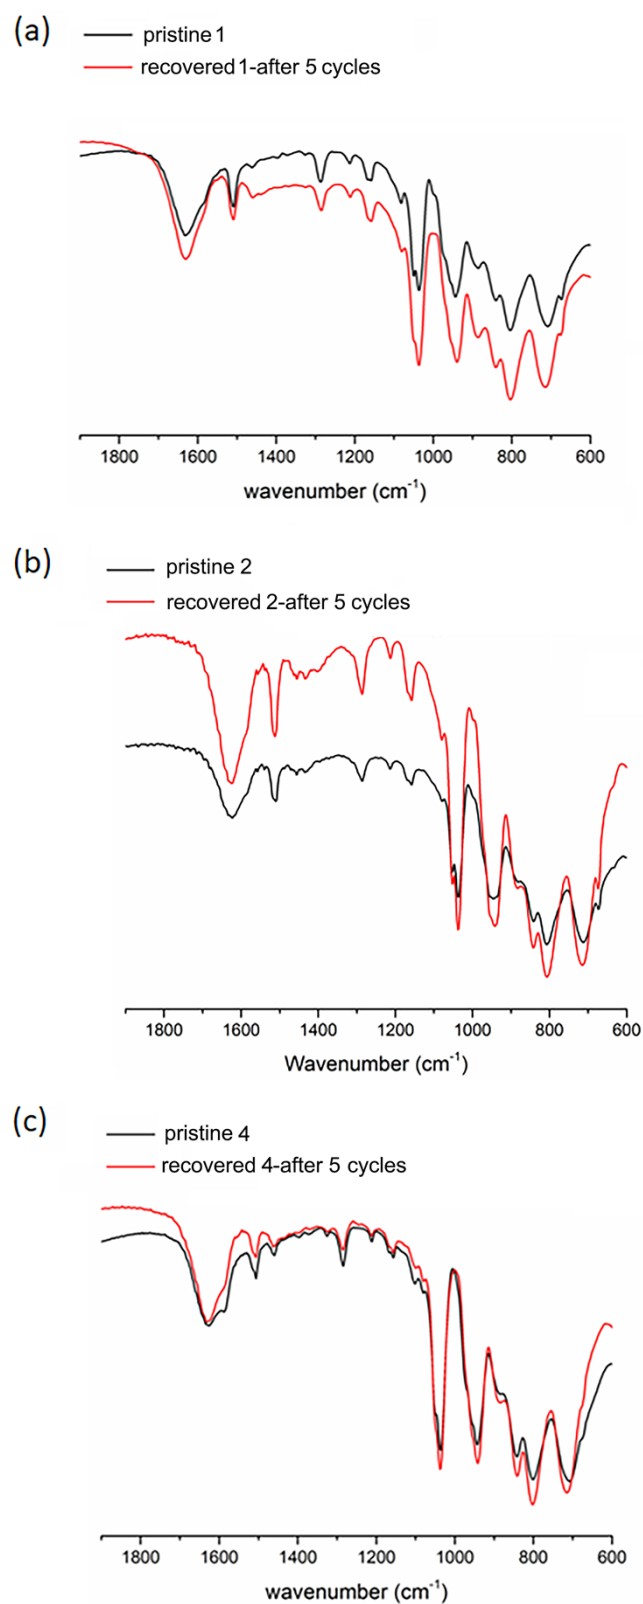

**Fig. S12** FT-IR spectra of pristine and recovered **1**, **2**, and **4**.

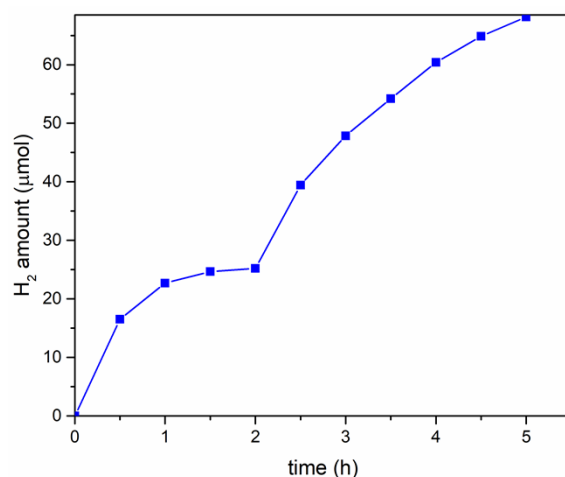

**Fig. S13** The recovered H<sub>2</sub> evolution capacity of the reaction system with **2**.

## References

- [S1] A. P. Ginsberg, in *Inorganic Syntheses, Vol. 27*, Wiley, New York, **1990**, pp. 85.
- [S2] G. M. Sheldrick, *Acta cryst., C*, **2015**, *71*, 3.
- [S3] Z.-K. Zhu, Y.-Y. Lin, H. Yu, X.-X. Li, S.-T. Zheng, *Angew. Chem. Int. Ed.*, **2019**, *58*, 16864.
- [S4] X. Shang, R. Liu, G. Zhang, S. Zhang, H. Cao, Z. Gu, *New J. Chem.*, **2014**, *38*, 1315.
- [S5] H. Lv, W. Guo, K. Wu, Z. Chen, J. Bacsa, D. G. Musaev, Y. V. Geletii, S. M. Lauinger, T. Lian, C. L. Hill, *J. Am. Chem. Soc.*, **2014**, *136*, 14015.
- [S6] H. Lv, J. Song, H. Zhu, Y. V. Geletii, J. Bacsa, C. Zhao, T. Lian, D. G. Musaev, G. L. Hill, *J. Catal.*, **2013**, *307*, 48.
- [S7] J.-H. Son, J. Wang, W. H. Casey, *Dalton Trans.*, **2014**, *43*, 17928.
- [S8] W.-C. Chen, C. Qin, X.-L. Wang, Y.-G. Li, H.-Y. Zang, Y.-Q. Jiao, P. Huang, K.-Z. Shao, Z.-M. Su, E.-B. Wang, *Chem. Commun.*, **2014**, *50*, 13265.
